# Supplementary material for: The Use of 117mSn&nbsp;(Tin) Colloid for Treatment of Naturally Occurring Grade 3 Elbow Osteoarthritis in Client Dogs
Source: Research Square preprint supplement (doi:10.21203/rs.3.rs-131907/v1), 2020-12-29
Supplement: Supplementary file 1 [file d09ef28801546d44ed6ab159.docx]

**The Use of 117mSn (tin) Colloid for Treatment of Naturally Occurring Grade 3 Elbow Osteoarthritis in Client Dogs**

Supplementary File

**Title:**  Canine Brief Pain Inventory

**Author:** Dorothy Cimino Brown, MSCE, DVM, DACVS

***Canine Brief Pain Inventory***

# Description of pain:

Rate your dog's pain:

1. Fill in the oval next to the one number that best describes the pain at its **worst** in the last 7days.


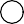

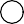

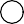

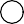

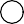

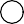

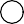

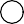

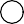

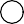

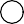
0 1 2 3 4 5 6 7 8 9 10

No pain Extreme pain

1. Fill in the oval next to the one number that best describes the pain at its **least** in the last 7 days


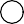

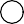

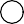

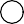

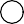

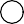

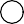

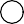

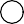

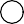

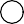
0 1 2 3 4 5 6 7 8 9 10

No pain Extreme pain

1. Fill in the oval next to the one number that best describes the pain at its **average** in the last 7 days.


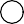

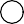

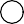

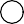

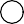

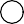

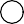

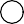

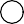

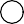

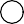
0 1 2 3 4 5 6 7 8 9 10

No pain Extreme pain

1. Fill in the oval next to the one number that best describes the pain as it is **right now**.


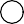

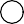

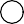

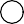

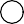

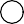

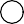

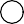

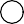

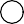

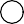
0 1 2 3 4 5 6 7 8 9 10

No pain Extreme pain

# Description of function:

Fill in the oval next to the one number that best describes how during the last 7 days **pain has interfered** with your dog's:

## General Activity


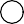

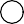

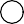

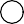

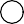

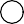

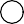

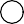

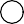

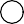

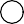
0 1 2 3 4 5 6 7 8 9 10

Does not interfere Completely interferes

## Enjoyment of Life


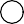

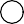

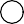

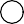

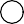

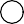

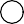

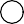

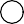

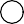

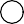
0 1 2 3 4 5 6 7 8 9 10

Does not interfere Completely interferes

## Ability to Rise to Standing From Lying Down


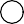

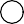

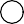

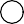

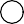

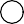

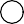

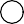

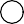

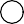

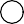
0 1 2 3 4 5 6 7 8 9 10

Does not interfere Completely interferes

1.
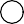

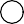

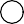

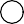

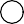

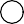

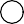

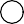

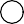

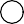

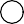
**Ability to Walk**

| 0  Does not interfere | 1 | 2 | 3 | 4 | 5 | 6 | 7 | 8 | 9 | 10  Completely interferes |
| --- | --- | --- | --- | --- | --- | --- | --- | --- | --- | --- |
| 9. **Ability to Run** |  |  |  |  |  |  |  |  |  |  |
| 0 | 1 | 2 | 3 | 4 | 5 | 6 | 7 | 8 | 9 | 10 |
| Does not interfere |  |  |  |  |  |  |  |  |  | Completely interferes |

1.
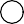

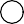

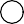

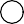

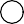

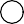

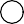

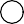

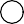

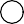

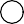
**Ability to Climb Stairs, Curbs, Doorsteps, etc.**


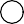
0 1 2 3 4 5 6 7 8 9 10

Does not interfere Completely interferes

# Overall impression:

1. Fill in the oval next to the one number that best describes your dog's overall quality of life over the last 7 days.

Poor Fair Good

Very Good

Excellent
